# Supplementary material for: Intensive Blood Pressure Control and Diabetes Mellitus Incidence for Patients with Impaired Fasting Glucose: A Secondary Analysis of SPRINT
Source: Hindawi journal article supplement (doi:10.1155/2023/7533353), 2023-03-16
Supplement: f1 [file 7533353.f1.pdf]

## Online supplemental material

Table s1: Baseline characteristics of study participants included in our secondary outcome analysis

| Characteristics                   | Overall<br>N= 2761 | Standard BP control<br>N= 1395 | Intensive BP control<br>N= 1366 | p-value |
|-----------------------------------|--------------------|--------------------------------|---------------------------------|---------|
| Age                               | 68 (61, 76)        | 68 (61, 76)                    | 68 (61, 76)                     | >0.9    |
| Gender (Female)                   | 811 (29%)          | 423 (30%)                      | 388 (28%)                       | 0.3     |
| BMI, (kg/m <sup>2</sup> )         | 29.5 (26.7, 33.2)  | 29.4 (26.8, 33.0)              | 29.5 (26.5, 33.4)               | 0.9     |
| SBP, mmHg                         | 138 (129, 148)     | 138 (129, 148)                 | 137 (129, 148)                  | 0.4     |
| DBP, mmHg                         | 77 (69, 85)        | 77 (69, 85)                    | 77 (69, 85)                     | 0.7     |
| SBP Tertile                       |                    |                                |                                 | 0.11    |
| <132 mmHg                         | 978 (35%)          | 471 (34%)                      | 507 (37%)                       |         |
| 132–145mmHg                       | 888 (32%)          | 471 (34%)                      | 417 (31%)                       |         |
| >145mmHg                          | 895 (32%)          | 453 (32%)                      | 442 (32%)                       |         |
| FRS (≥15%)                        | 1,802 (65%)        | 906 (65%)                      | 896 (66%)                       | 0.7     |
| Race (Black)                      | 679 (25%)          | 345 (25%)                      | 334 (24%)                       | 0.9     |
| Number of antihypertensive agents |                    |                                |                                 | 0.4     |
| <2                                | 1,010 (37%)        | 521 (37%)                      | 489 (36%)                       |         |
| ≥2                                | 1,751 (63%)        | 874 (63%)                      | 877 (64%)                       |         |
| Aspirin                           | 1,485 (54%)        | 738 (53%)                      | 747 (55%)                       | 0.3     |
| Smoking status                    |                    |                                |                                 | 0.9     |

|                                         |                   |                   |                   |      |
|-----------------------------------------|-------------------|-------------------|-------------------|------|
| Never smoked                            | 1,197 (43%)       | 608 (44%)         | 589 (43%)         |      |
| Former smoker                           | 1,276 (46%)       | 636 (46%)         | 640 (47%)         |      |
| Current smoker                          | 286 (10%)         | 150 (11%)         | 136 (10.0%)       |      |
| Missing data                            | 2 (<0.1%)         | 1 (<0.1%)         | 1 (<0.1%)         |      |
| Baseline CKD                            | 783 (28%)         | 400 (29%)         | 383 (28%)         | 0.7  |
| Previous CVD                            | 570 (21%)         | 286 (21%)         | 284 (21%)         | 0.9  |
| eGFR, mL/min/1.73m <sup>2</sup>         | 71 (58, 84)       | 70 (58, 84)       | 72 (58, 85)       | 0.2  |
| Serum creatinine, mg/dL                 | 1.02 (0.87, 1.21) | 1.03 (0.86, 1.22) | 1.01 (0.87, 1.21) | 0.4  |
| CHR, mg/dL                              | 184 (158, 212)    | 185 (160, 214)    | 183 (157, 210)    | 0.15 |
| GLUR, mg/dL                             | 105 (102, 110)    | 105 (102, 110)    | 105 (102, 110)    | 0.5  |
| HDL, mg/dL                              | 49 (42, 58)       | 49 (42, 58)       | 49 (41, 58)       | 0.3  |
| TRR, mg/dL                              | 113 (81, 158)     | 112 (81, 158)     | 113 (82, 156)     | 0.8  |
| Urine albumin-to-creatinine ratio, mg/g | 10 (6, 22)        | 10 (5, 22)        | 10 (6, 21)        | 0.4  |

---

Data were expressed as median (interquartile range) or number(percentage); BP: blood pressure; BMI: body mass index; SBP: systolic blood pressure; DBP: diastolic blood pressure; FRS: Framingham risk score; CKD: chronic kidney disease; CVD: cardiovascular disease; eGFR: estimated glomerular filtration rates; CHR: Cholesterol; GLUR: Glucose; HDL: high density lipoprotein cholesterol direct; TRR: Triglycerides; To convert the values for creatinine to micromoles per liter, multiply by 88.4. To convert the values for cholesterol to millimoles per liter, multiply by 0.02586. To convert the values for triglycerides to millimoles per liter, multiply by 0.01129. To convert the values for glucose to millimoles per liter, multiply by 0.05551. Race and ethnic group were self-reported. BMI is the weight in kilograms divided by the square of the height in meters.

Table s2 Incident outcome events by two treatment strategies after excluding participants who developed incident events within the first year or 24 months of follow-up

|               | Standard BP control | Intensive BP control |         |
|---------------|---------------------|----------------------|---------|
| Incident T2D  | N = 1582            | N = 1594             | p-value |
| No. of events | 244 (15%)           | 274 (17%)            | 0.2     |
| HR (95% CI)   | Reference           | 1.16(0.98-1.38)      | 0.09    |
| Incident IFGR | N = 979             | N = 992              |         |
| No. of events | 216 (22%)           | 185 (19%)            | 0.06    |
| HR (95% CI)   | Reference           | 0.89(0.73, 1.09)     | 0.05    |

Abbreviations: T2D: type 2 diabetes; IFGR: impaired fasting glucose reversion; BP: blood pressure; HR: hazard ratio; CI: confidence interval;

Table s3 Incident outcome events by two treatment strategies after excluding participants who loss to follow-up or withdraw their consent

|               | Standard BP control | Intensive BP control |         |
|---------------|---------------------|----------------------|---------|
| Incident T2D  | N = 1564            | N = 1583             | p-value |
| No. of events | 256 (16%)           | 288 (18%)            | 0.2     |
| HR (95% CI)   | Reference           | 1.16(0.98-1.37)      | 0.09    |
| Incident IFGR | N = 1308            | N = 1295             |         |
| No. of events | 627 (48%)           | 557 (43%)            | 0.012   |
| HR (95% CI)   | Reference           | 0.90(0.80-1.00)      | 0.058   |

Abbreviations: T2D: type 2 diabetes; IFGR: impaired fasting glucose reversion; BP: blood pressure; HR: hazard ratio; CI: confidence interval;

Table s4 Incidence of outcome events and blood glucose levels at different time points of follow-up

| <b>Incident T2D</b>                    | <b>No. of participants</b> | <b>Overall</b>         | <b>Standard BP control</b> | <b>Intensive BP control</b> | <b>p-value</b> |
|----------------------------------------|----------------------------|------------------------|----------------------------|-----------------------------|----------------|
|                                        |                            | N = 3310               | N = 1651                   | N = 1659                    |                |
| 12m                                    | 3,310                      | 62 (1.9%)<br>N = 3248  | 24 (1.5%)<br>N = 1627      | 38 (2.3%)<br>N = 1621       | 0.076          |
| 24m                                    | 3,248                      | 203 (6.2%)<br>N = 3045 | 87 (5.3%)<br>N = 1540      | 116 (7.2%)<br>N = 1,505     | 0.033          |
| 36m                                    | 3,045                      | 69 (2.3%)<br>N = 2976  | 32 (2.1%)<br>N = 1508      | 37 (2.5%)<br>N = 1468       | 0.5            |
| Closeout                               | 2,976                      | 215 (7.2%)             | 113 (7.5%)                 | 102 (6.9%)                  | 0.6            |
| <b>Incident IFGR</b>                   |                            | N = 2761               | N = 1395                   | N = 1366                    |                |
| 24m                                    | 2,761                      | 790 (29%)<br>N = 1971  | 416 (30%)<br>N = 979       | 374 (27%)<br>N = 992        | 0.2            |
| 48m                                    | 1,971                      | 172 (8.7%)<br>N = 1799 | 91 (9.3%)<br>N = 888       | 81 (8.2%)<br>N = 911        | 0.4            |
| Closeout                               | 1,799                      | 229 (13%)              | 125 (14%)                  | 104 (11%)                   | 0.091          |
| <b>Glucose level<br/>(median, IQR)</b> |                            |                        |                            |                             |                |
| 24m                                    | 2,402                      | 103 (97, 109)          | 102 (96, 109)              | 103 (98, 110)               | 0.003          |
| 48m                                    | 569                        | 103 (98, 109)          | 103 (98, 109)              | 104 (97, 109)               | >0.9           |
| Closeout                               | 937                        | 105 (99, 113)          | 104 (98, 112)              | 105 (99, 113)               | 0.14           |

Abbreviations: BP: blood pressure; m: month;
